# Supplementary material for: N-glycosylation in the SERPIN domain of the C1-esterase inhibitor in hereditary angioedema
Source: JCI journal article supplement (doi:10.1172/jci.insight.185548), 2025-01-16
Supplement: sd2 [file 2]

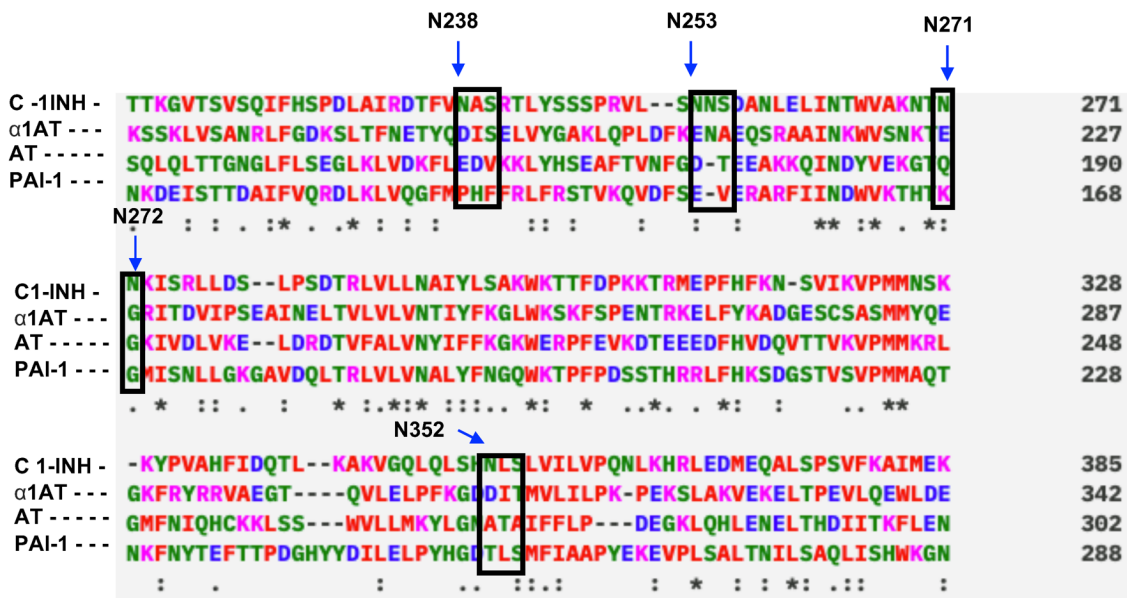

**Supplemental Figure 1. Amino acid sequence alignment of selected SERPIN proteins.**

Sequence alignments were generated with NCBI protein blast software Clustal Omega. Red color presents small and hydrophobic; blue presents acidic; magenta indicates basic; and green shows hydroxyl, sulfhydryl, and amine residues. C1-INH, C1 inhibitor esterase; AT, antithrombin; α1AT, α1-antitrypsin; PAI-1, plasminogen activator inhibitor 1. “\*” represents positions with a single, fully conserved residue. “:” represents positions with a conservation between amino acid groups of similar properties. “.” Represents positions with conservation between amino acid groups of weakly similar properties.
